# Supplementary material for: Superlow load of nanosized MnO on a porous carbon matrix from wood fibre with superior lithium ion storage performance
Source: Royal Society of Chemistry journal article supplement (doi:10.1039/c4ta04471a), 2014-01-01
Supplement: c4ta04471a1.pdf [file c4ta04471a1.pdf]

## Electronic Supplementary Information

### Superlow load of nanosized MnO on the porous carbon matrix from wood fibre with superior lithium ion storage performance

Chunxiao Yang,<sup>a</sup> Qiuming Gao,<sup>a\*</sup> Weiqian Tian,<sup>a</sup> Yanli Tan,<sup>a</sup> Tao Zhang,<sup>b</sup> Kai Yang<sup>a</sup> and Lihua Zhu<sup>a</sup>

#### Preparation of the MnO/C with different contents of MnO:

China fir (CF) was air dried with the water content lower than 20 wt.%. The CF xylem fibres were smashed and sieved to powder. 1.00 g of the CF powder was washed three times in deionized water to remove the dissolved impurity. To prepare MnO/C nanocomposite materials with different MnO contents, different amounts of KMnO<sub>4</sub> and Na<sub>2</sub>SO<sub>4</sub>, including 0.02 g KMnO<sub>4</sub> and 0.02 g Na<sub>2</sub>SO<sub>4</sub> for MnO/C-1.9, 0.035 g KMnO<sub>4</sub> and 0.035 g Na<sub>2</sub>SO<sub>4</sub> for MnO/C-3.2 and 0.09 g KMnO<sub>4</sub> and 0.09 g Na<sub>2</sub>SO<sub>4</sub> for MnO/C-8.9, were dispersed into distilled water. The CF powders were added into the above precursor solutions and stirred for 1 h at room temperature. After soaked, the brown precipitates were filtered and washed and dried at 60°C for 12 h in an oven. In order to obtain MnO/C composite materials, the as-prepared precursor samples were placed inside an alumina boat in dimethylformamide and heated in a tube furnace to 600°C at a rate of 2°C min<sup>-1</sup> and kept for 4 h under a flowing N<sub>2</sub> atmosphere.

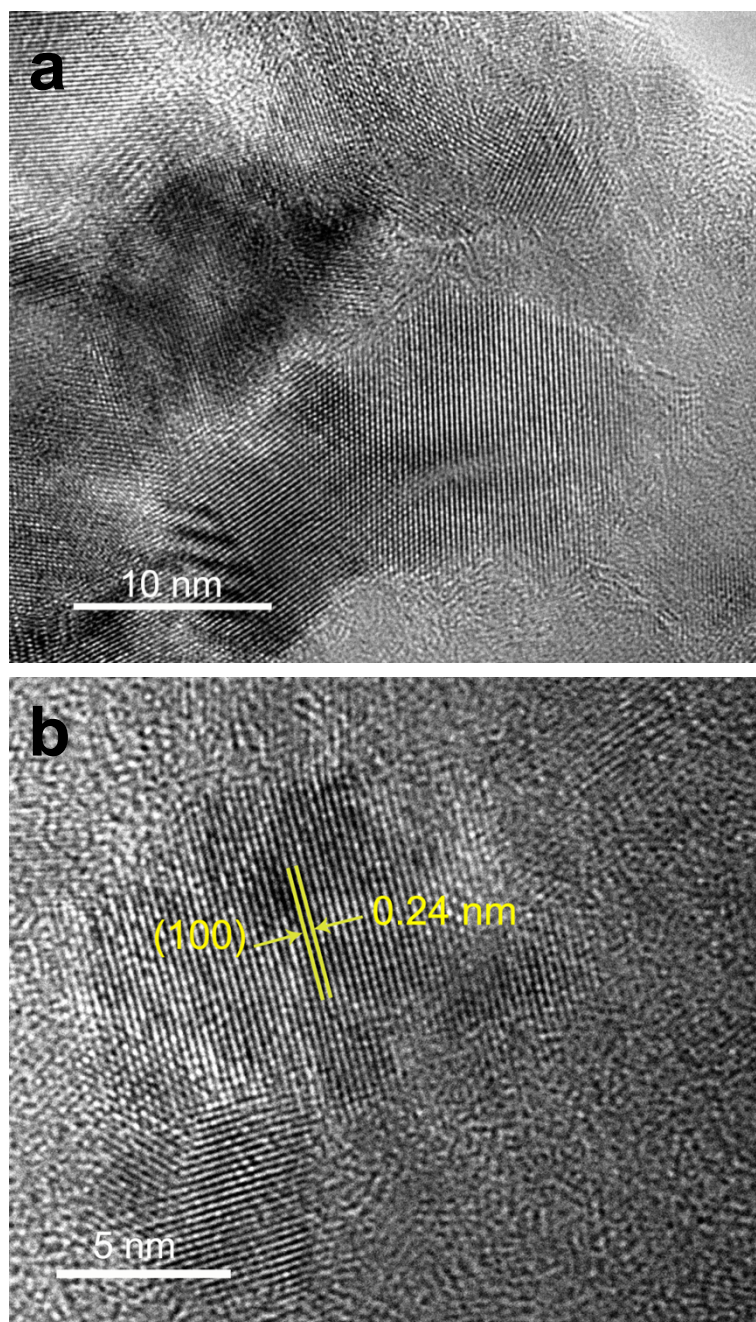

**Figure S1:** (HE)TEM images of the MnO<sub>2</sub>/CF precursor with different enlargements (a and b). The periodic lattice fringe with distinct interplanar distance of 0.24 nm corresponding to the (100) plane of MnO<sub>2</sub> (JCPDS No. 42-1169) (b).

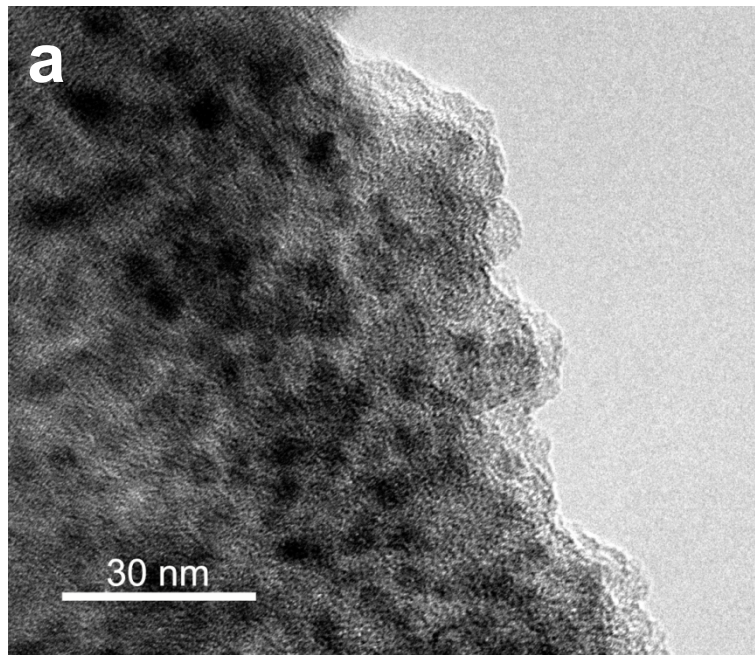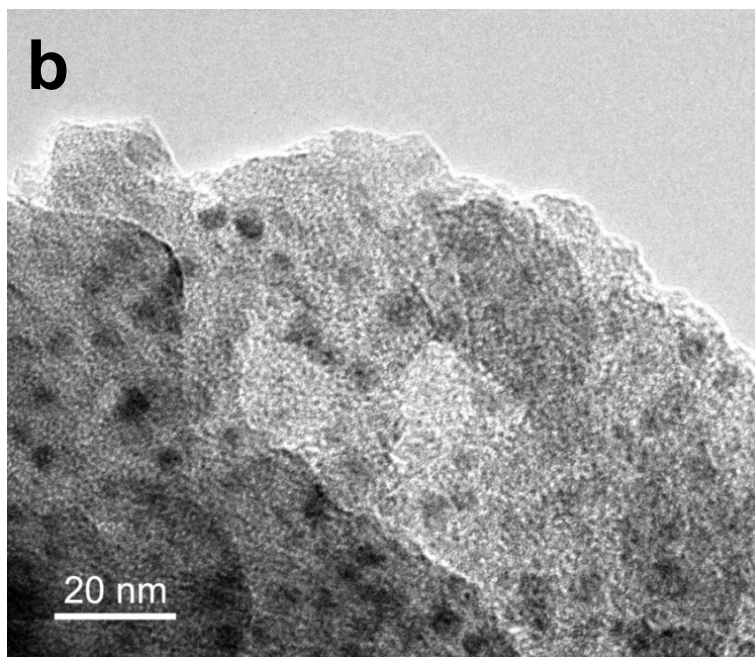

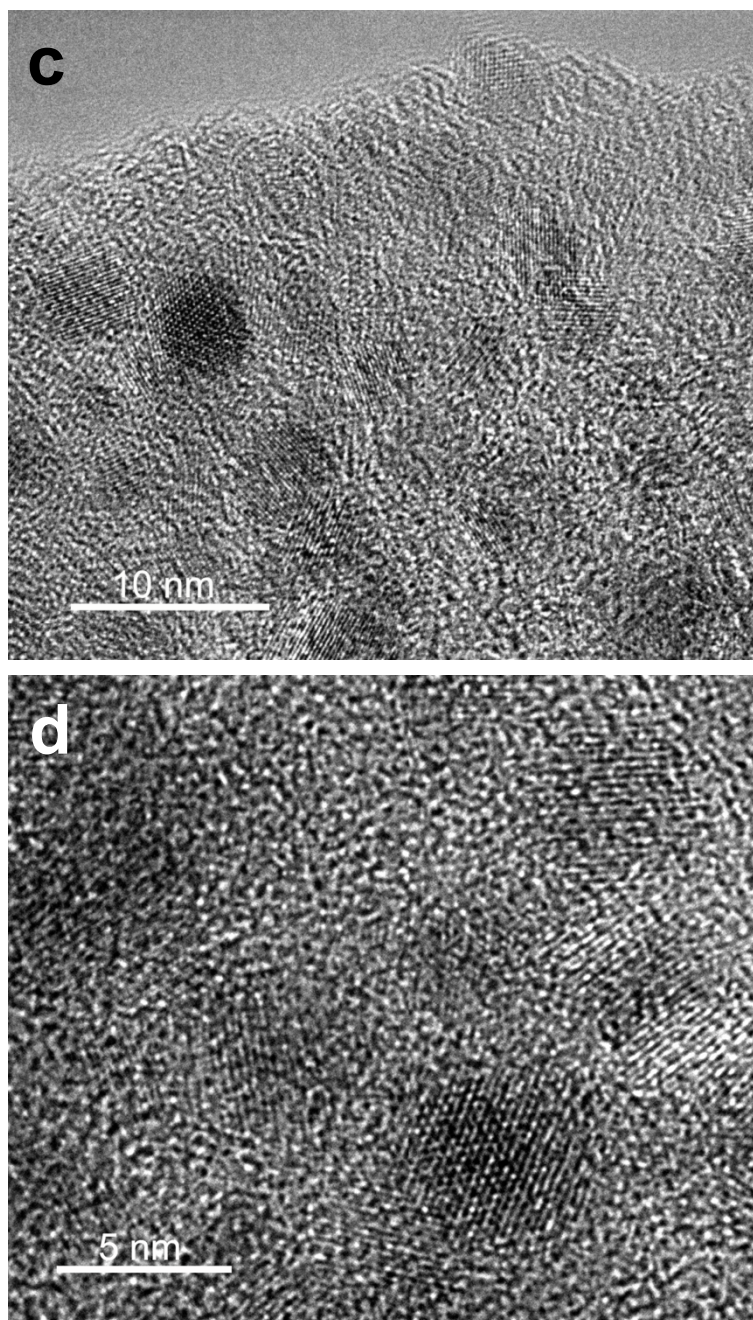

**Figure S2:** (HR)TEM images of the MnO/C sample with different enlargements (a-d). The well-crystallized MnO nanoparticles with diameters ranging from 3 to 7 nm are evenly dispersed on the carbon matrix.

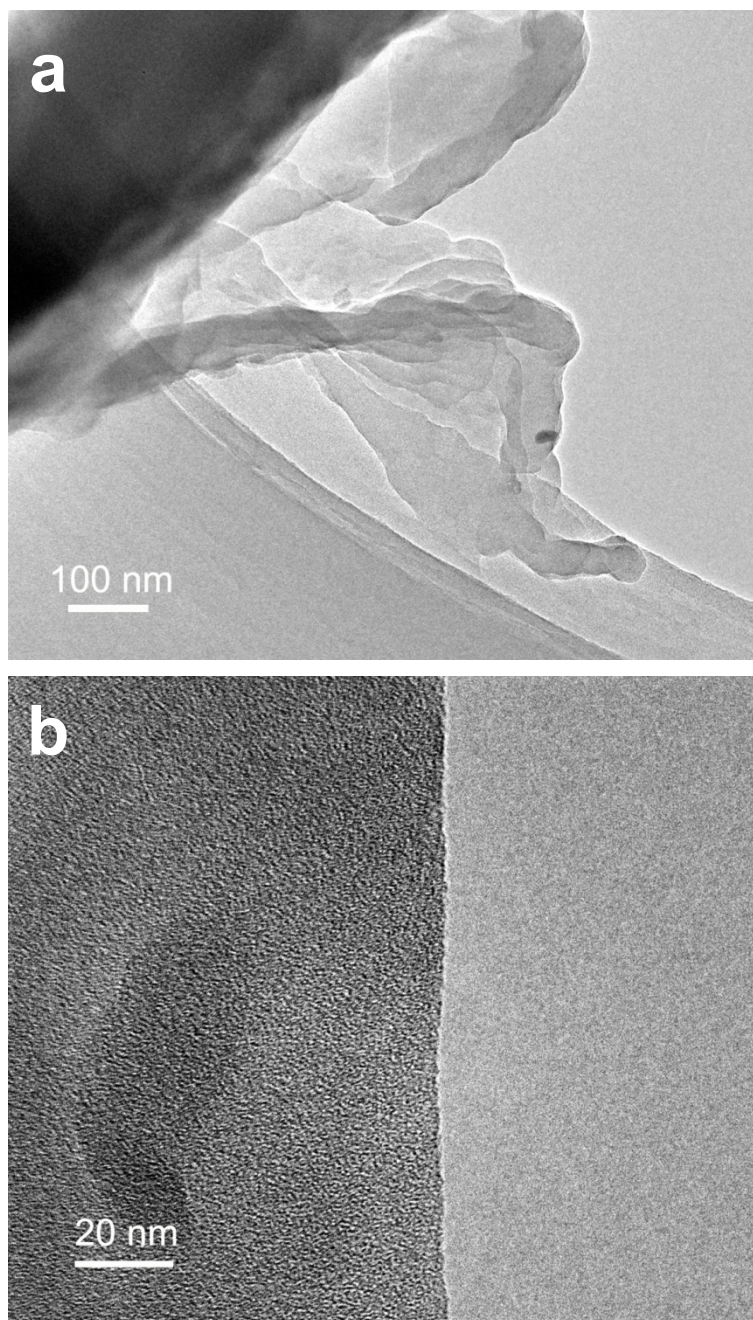

**Figure S3:** (HR)TEM images of natural CF with different enlargements (a and b). The natural CF's multiple layers could be observed from the images.

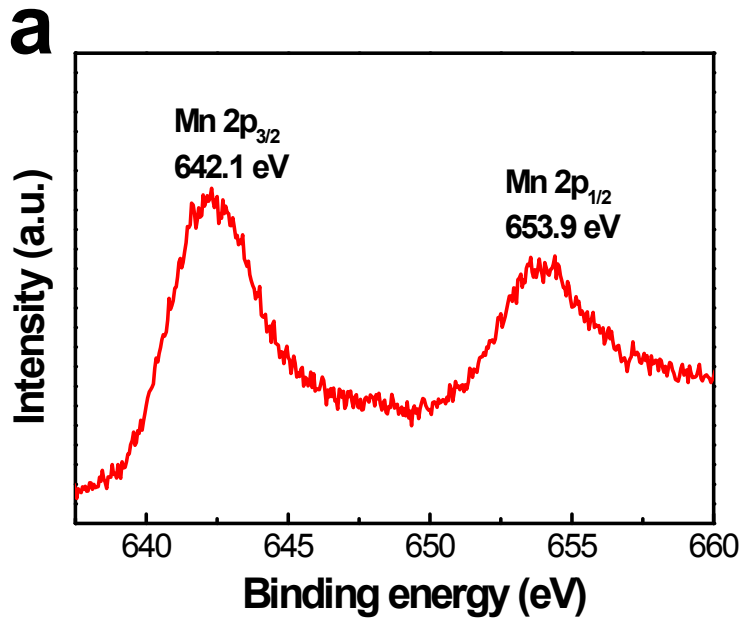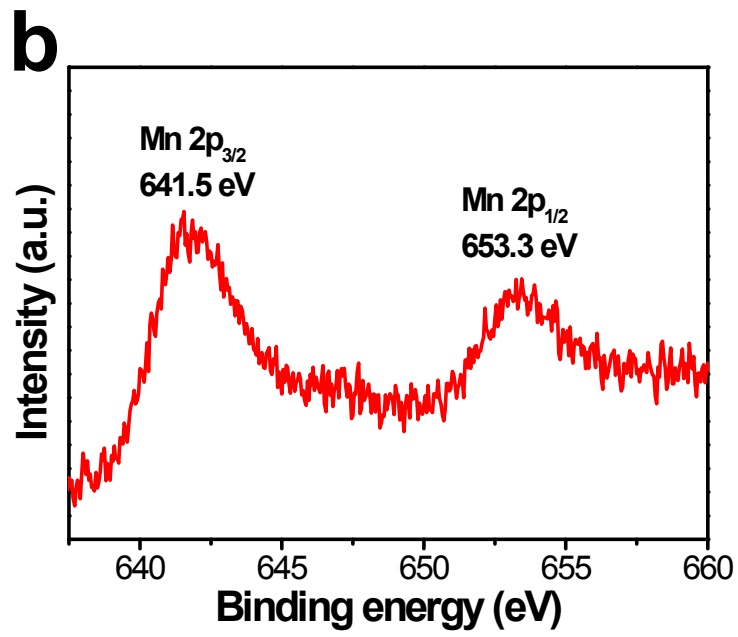

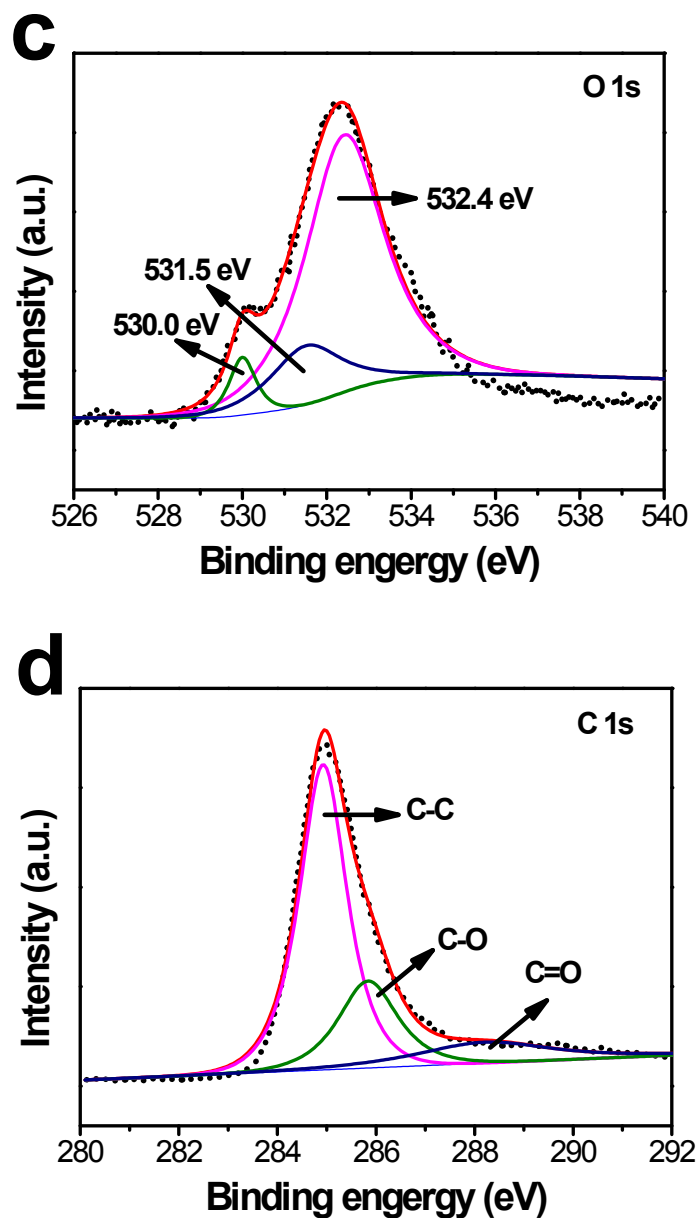

**Figure S4:** XPS spectrum of the MnO<sub>2</sub>/CF precursor (a) and MnO/C sample (b-d). Two typical bands at 642.1 and 653.9 eV (a) is corresponding to the 2p<sub>3/2</sub> and 2p<sub>1/2</sub> orbits of Mn<sup>4+</sup> of MnO<sub>2</sub>, respectively. The two signals at 641.5 and 653.3 eV (b) may be attributed to Mn (II) 2p<sub>3/2</sub> and 2p<sub>1/2</sub> orbits, respectively, characteristic of MnO. The band at 532.4, 531.5 and 530.0 eV (c) can be assigned to the oxygen bond of C-OH phenol groups and/or C-O-C ether groups, Mn-O and C=O, respectively. A strong C 1s peak at 284.9 eV (d) corresponds to the graphitic carbon. The weaker one at 286.1 eV arising from the C-O, while the peak at about of 288.5 eV indicates the formation of C=O bonds.

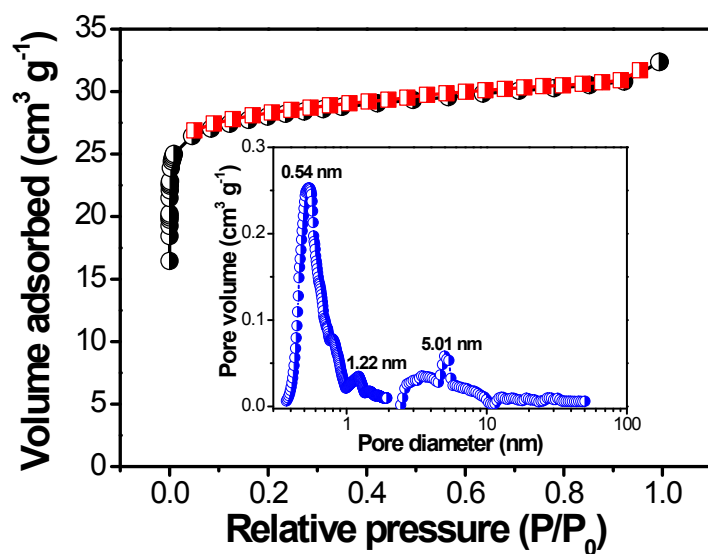

**Figure S5:** N<sub>2</sub> adsorption-desorption isotherms of the pure carbon. The insert is the pore size distribution curve calculated from the adsorption branch by the DFT model.

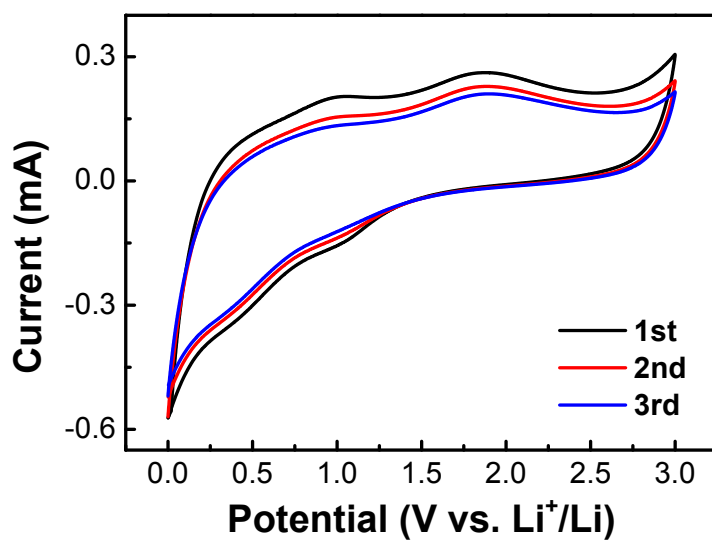

**Figure S6:** CV curves of the MnO/C sample at a scan rate of 1 mV s<sup>-1</sup>.



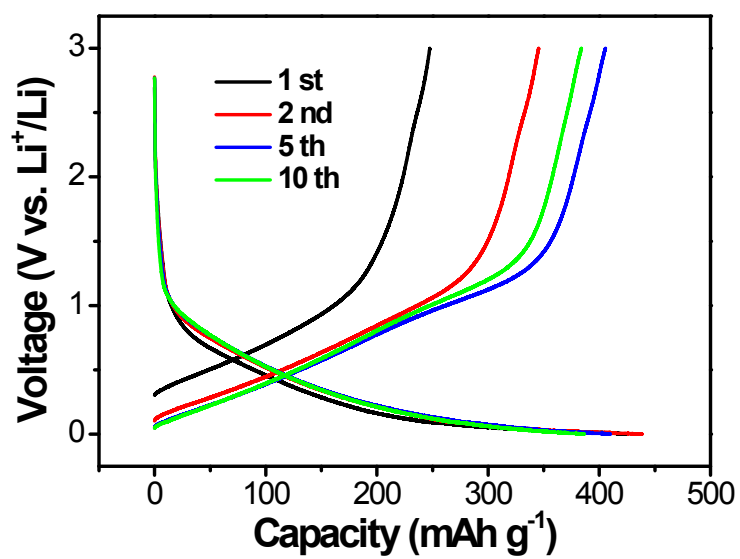

**Figure S7:** Charge-discharge profiles of the electrode containing pure carbon for cycles with a current density of 0.1 A g<sup>-1</sup>.

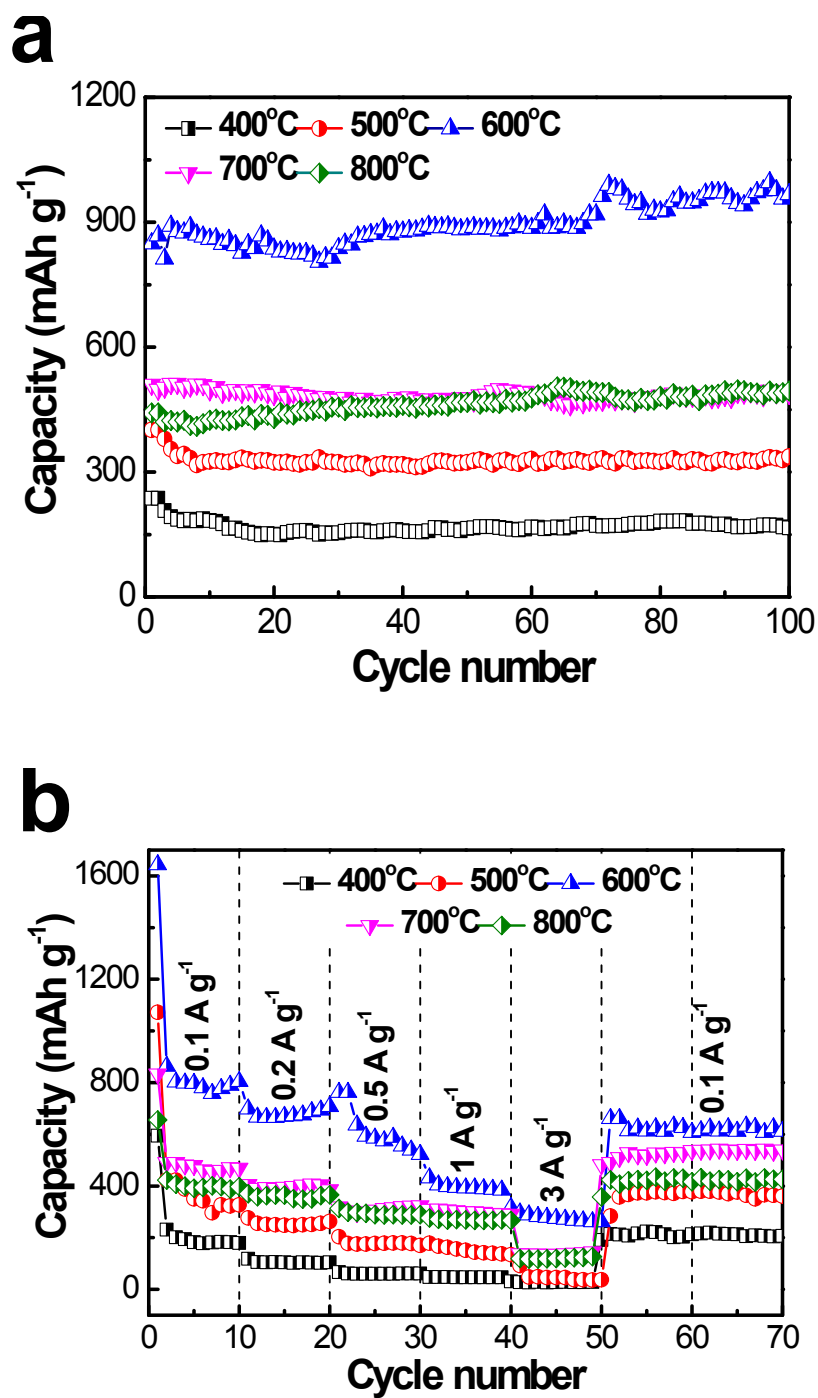

**Figure S8:** Cycling performance (a) and rate property (b) of the MnO/C electrodes with different calcination temperatures.

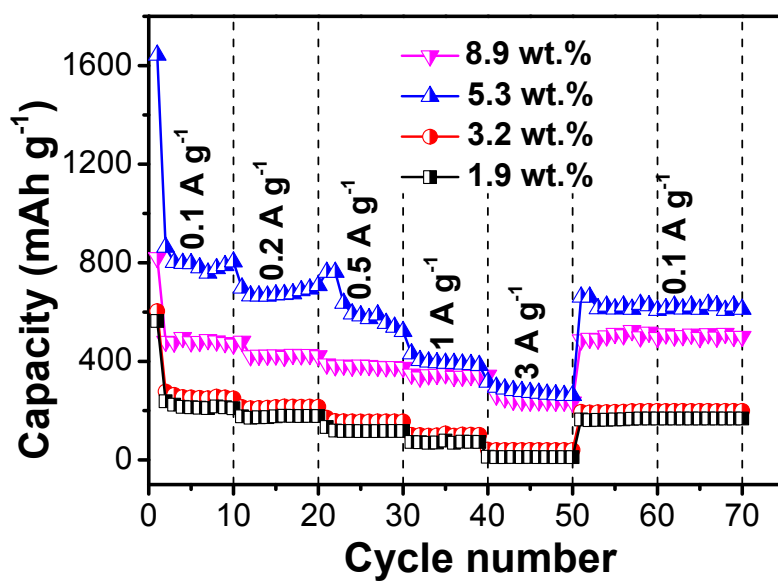

**Figure S9:** Rate performance of the electrodes containing MnO/C treated at 600°C with different MnO contents (1.9, 3.2, 5.3 and 8.9 wt.%).

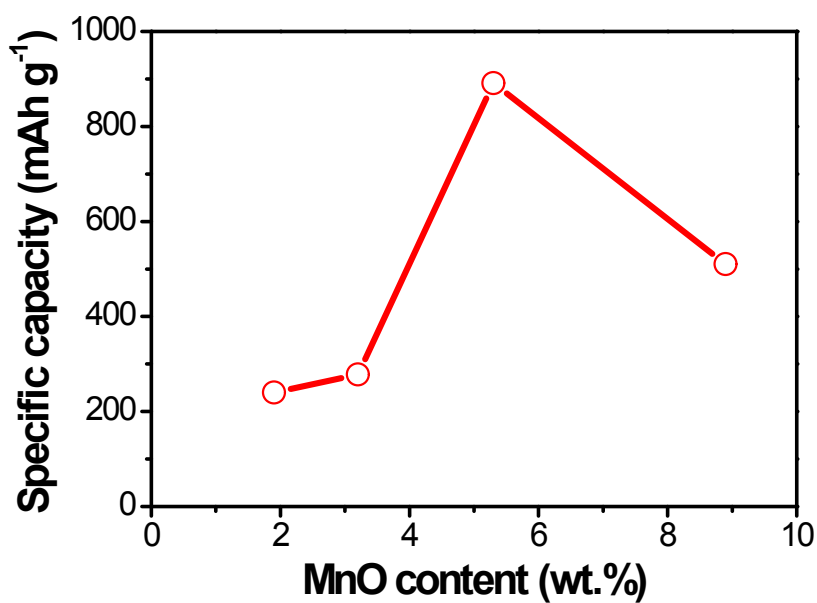

**Figure S10:** Specific capacity of the electrodes containing MnO/C treated at 600°C with different MnO contents (1.9, 3.2, 5.3 and 8.9 wt.%) at a current density of 0.1 A g<sup>-1</sup>.

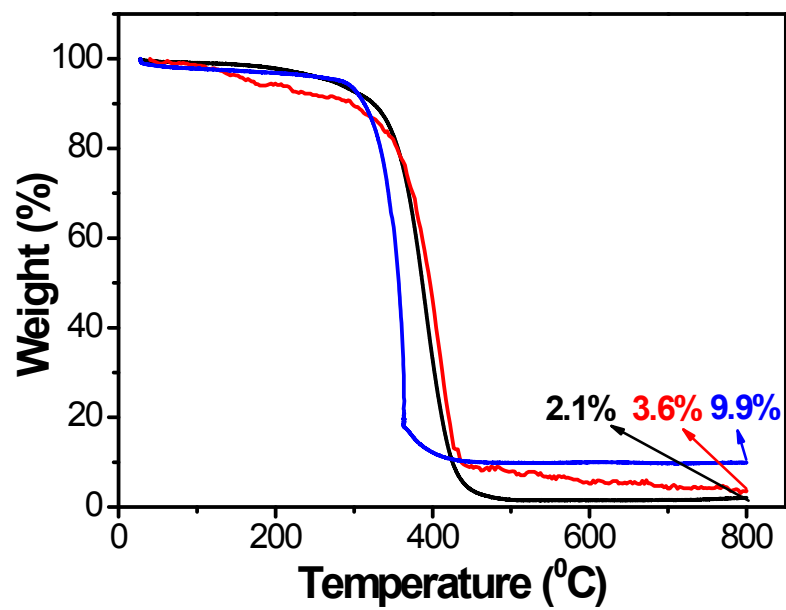

**Figure S11:** TGA curves of the electrodes containing MnO/C with different MnO contents (1.9, 3.2 and 8.9 wt.%)..

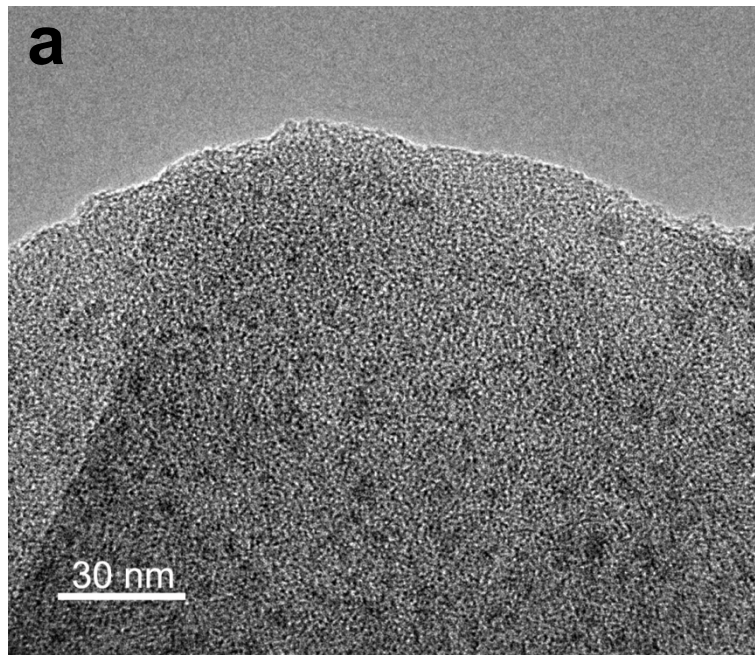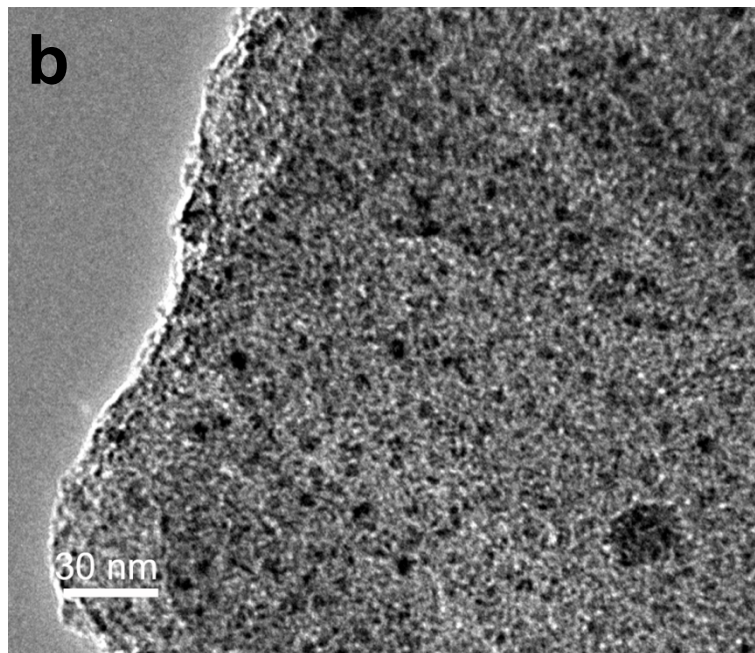

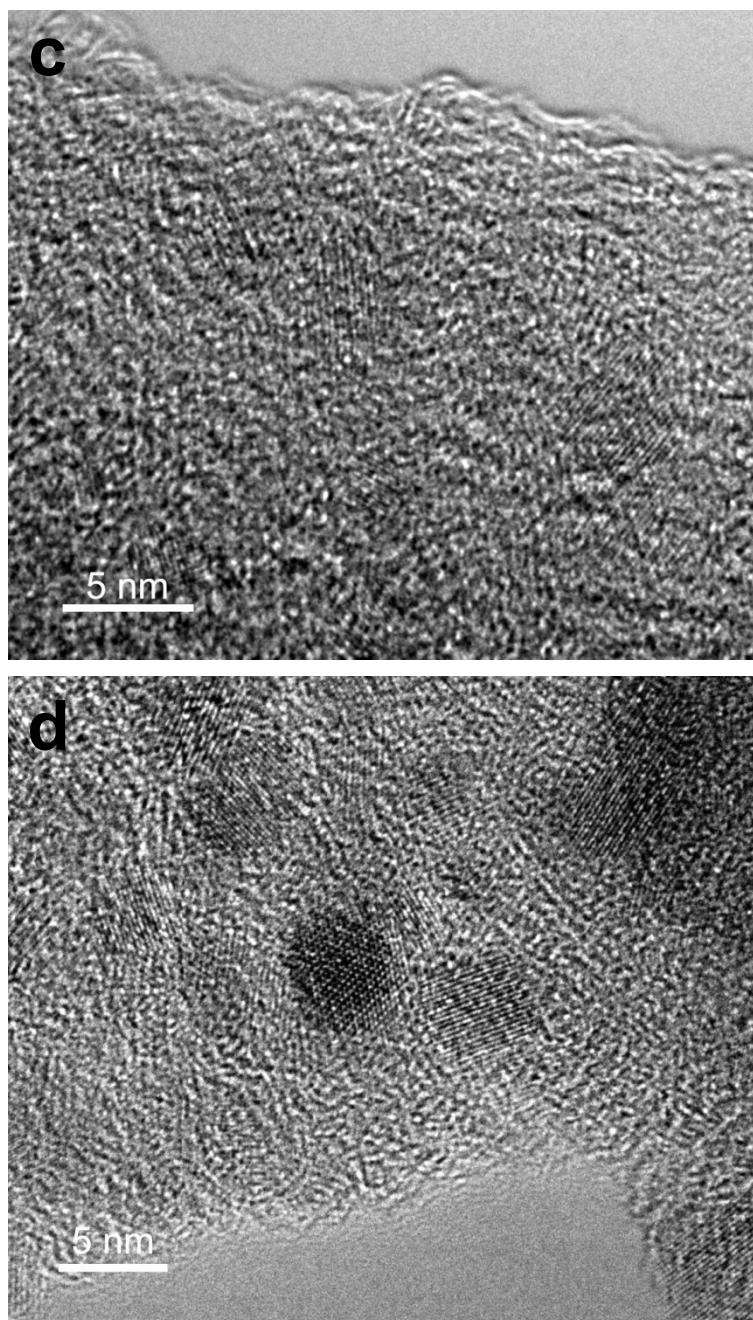

**Figure S12:** The HRTEM images of the MnO/C-1.90 (a and c) and the MnO/C-8.85 (b and d) samples.

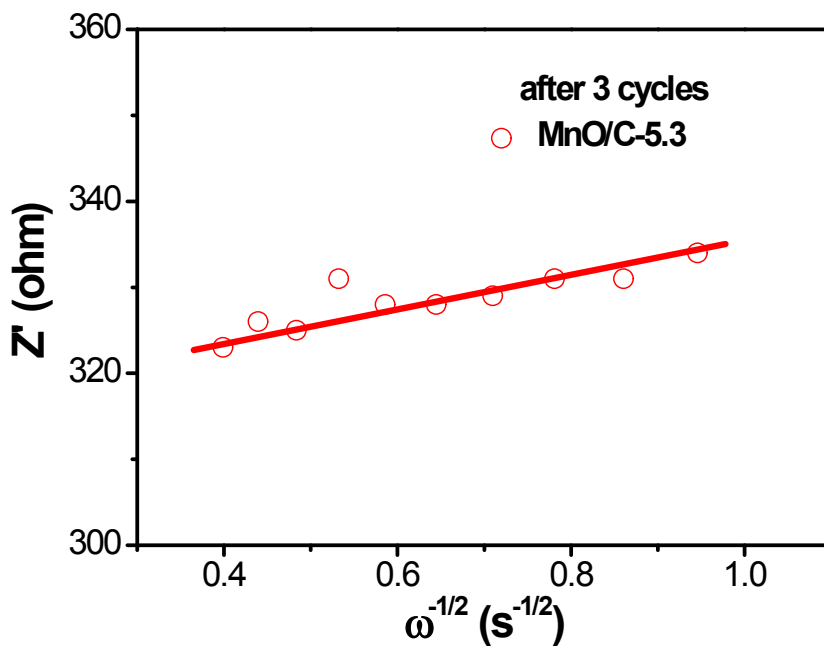

**Figure S13:** The relationship between  $Z'$  and  $\omega^{-1/2}$  at low frequency for the MnO/C-5.3 after 3 cycles.

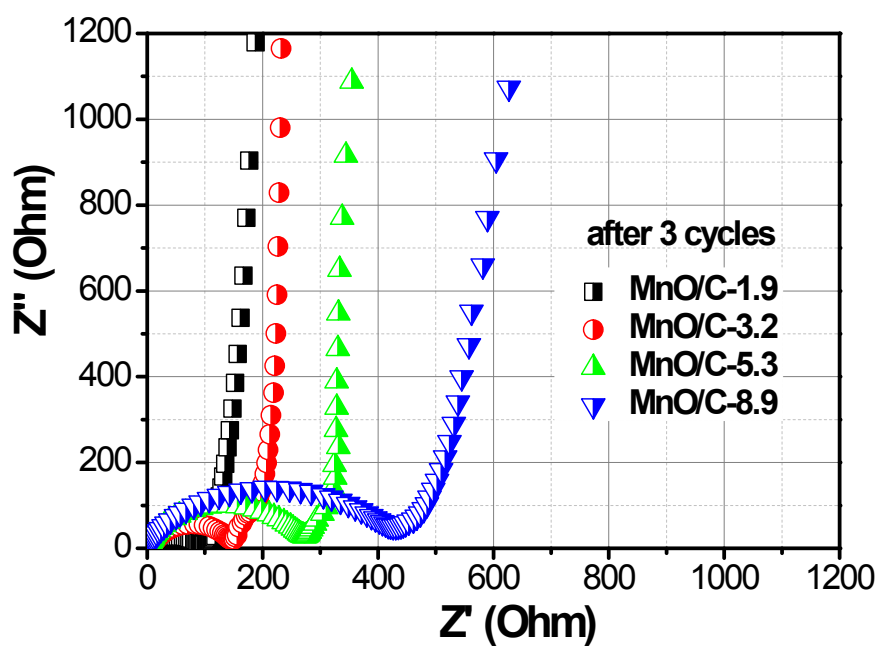

**Figure S14:** The Nyquist plots of the MnO/C electrodes with various MnO contents.

**Table S1** Comparison of the MnO content, BET specific surface area and specific capacity of the MnO/C composite material by different methods.

| Sample              | MnO content [wt.%] | BET specific surface area [ $\text{m}^2\text{g}^{-1}$ ] | First discharge specific capacity [ $\text{mAh g}^{-1}$ ] | Specific capacity after X cycles at Y mA $\text{g}^{-1}$ [ $\text{mAh g}^{-1}$ ] | Reference |
|---------------------|--------------------|---------------------------------------------------------|-----------------------------------------------------------|----------------------------------------------------------------------------------|-----------|
| MnO/C nanotube      | 96.8               | 40.0                                                    | 1129                                                      | 763<br>(X=100,Y=100)                                                             | 22        |
| MnO/C nanowires     | 94.4               | 6.86                                                    | 1196                                                      | 801<br>(X=200,Y=100)                                                             | 62        |
| MnO@1-D carbon      | 89.4               | -                                                       | 1249                                                      | 763<br>(X=100,Y=100)                                                             | 31        |
| MnO/C network       | 87.3               | 82.7                                                    | 1456                                                      | 1224<br>(X=200,Y=200)                                                            | 63        |
| MnO/Graphene        | 82.6               | 50.3                                                    | 890                                                       | 2014<br>(X=150,Y=200)                                                            | 28        |
| MnO/Microalgae      | 76.4               | 76.9                                                    | 1021                                                      | 702<br>(X=50,Y=100)                                                              | 34        |
| MnO/C-N web         | 76.3               | -                                                       | 1272                                                      | 650<br>(X=100,Y=1000)                                                            | 33        |
| 3D MnO/CNS          | 73.0               | 25.0                                                    | 580                                                       | 890<br>(X=500,Y=100)                                                             | 36        |
| MnO/C nanoplate     | 60.0               | -                                                       | 1265                                                      | 563<br>(X=30,Y=200)                                                              | 25        |
| MnO/C nanocomposite | 4.5                | 429.1                                                   | 1620                                                      | 952<br>(X=100,Y=100)                                                             | Our work  |



**Table S2** Comparison of the resistance of electrolyte ( $R_s$ ), the charge transfer resistance ( $R_{ct}$ ) and diffusion coefficient ( $D$ ) of the MnO/C composite sample with various MnO contents.

| Sample    | $R_s$ [ $\Omega$ ] | $R_{ct}$ [ $\Omega$ ] | $\sigma_w$ [ $\Omega \text{ cm}^2 \text{ s}^{-0.5}$ ] | $D$ [ $\text{cm}^2 \text{ s}^{-1}$ ]* |
|-----------|--------------------|-----------------------|-------------------------------------------------------|---------------------------------------|
| MnO/C-1.9 | 2.8                | 95                    | 18.5                                                  | $1.6 \times 10^{-12}$                 |
| MnO/C-3.2 | 2.8                | 148                   | 17.2                                                  | $1.9 \times 10^{-12}$                 |
| MnO/C-5.3 | 2.4                | 271                   | 15.9                                                  | $2.2 \times 10^{-12}$                 |
| MnO/C-8.9 | 3.7                | 431                   | 24.2                                                  | $9.5 \times 10^{-13}$                 |

\* $D = 0.5(R \cdot T / (A \cdot F^2 \cdot \sigma_w \cdot C))^2$ , where  $R$  ( $8.314 \text{ J K}^{-1} \text{ mol}^{-1}$ ) is the gas constant,  $T$  ( $298.5 \text{ K}$ ) is the Kelvin temperature,  $A$  ( $\pi \times 0.5^2 \text{ cm}^2$ ) is the area of the electrode surface,  $F$  ( $96500 \text{ C mol}^{-1}$ ) is Faraday constant,  $C$  ( $1 \text{ mol}$ ) is the molar concentration of  $\text{Li}^+$  ion, and  $\sigma_w$  is the Warburg coefficient. With Randles plotting, that is plotting  $Z'$  with  $\omega^{-1/2}$  ( $\omega = 2\pi f$ ) for a low-frequency Warburg response, the Warburg coefficient  $\sigma_w$  can be obtained by measuring the slope of such plots. The diffusion coefficient  $D$  of MnO/C-5.3 is the largest among the MnO/C-1.9, 3.2, 5.3 and 8.9 samples.

## Notes

<sup>a</sup>Key Laboratory of Bio-inspired Smart Interfacial Science and Technology of Ministry of Education, Beijing Key Laboratory of Bio-inspired Energy Materials and Devices, School of Chemistry and Environment, Beihang University, Beijing 100191, P. R. China. <sup>b</sup>Beijing Centre for Physical and Chemical Analysis, Beijing 100089, P. R. China. Correspondence should be addressed to Q. Gao. E-mail: [qmgao@buaa.edu.cn](mailto:qmgao@buaa.edu.cn). Tel: +861082338212. Fax: +861082338212.
